# Supplementary material
Source: publisher site journal article supplement (https://www.kjim.org/upload/media/kjim-2024-080-Supplementary-Fig-1.pdf)
Supplement: Supplementary file 1 [file kjim-2024-080-Supplementary-Fig-1.pdf]

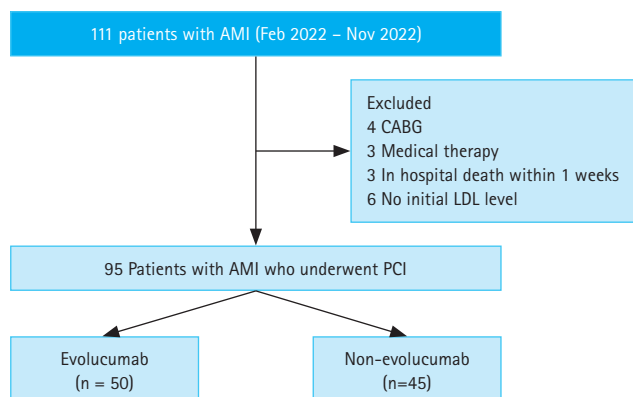

**Supplementary Figure 1.** Study flowchart. CABG, coronary artery bypass grafting; LDL, low-density lipoprotein; AMI, acute myocardial infarction; PCI, percutaneous coronary intervention.
